# Supplementary material for: Transition metal doped pyrite (FeS2) thin films: structural properties and evaluation of optical band gap energies
Source: Royal Society of Chemistry journal article supplement (doi:10.1039/c5tc03275j), 2015-01-01
Supplement: c5tc03275j1.pdf [file c5tc03275j1.pdf]

## Supporting Information

### Structural, Surface and Optical Properties of Transition Metal Doped Pyrite Thin Films by Aerosol-Assisted Chemical Vapour Deposition.

Sadia Khalid,<sup>a,b,c</sup> M. Azad Malik\*<sup>a</sup>, David J. Lewis<sup>a,d</sup>, Ejaz Ahmed<sup>b</sup>, Punjara Kevin,<sup>d</sup> Yaqoob Khan<sup>c</sup>, Paul O'Brie<sup>a,d</sup>

<sup>a</sup>School of Materials, The University of Manchester, Oxford Road, Manchester, M13 9PL, U.K..

<sup>b</sup>Department of Physics, BahauddinZakariya University, Multan 60800, Pakistan.

<sup>c</sup>Nanoscience and Catalysis Division, National Centre for Physics, Quaid-i-Azam University Campus, Islamabad, 45320- Pakistan

<sup>d</sup>School of Chemistry, The University of Manchester, Oxford Road, Manchester, M13 9PL, U.K..

#### Corresponding Author

Dr. Mohammed Azad Malik.

Email: azad.malik@manchester.ac.uk.

Tel: +44 161 275 4653.

Fax: +44 161 275 4616.

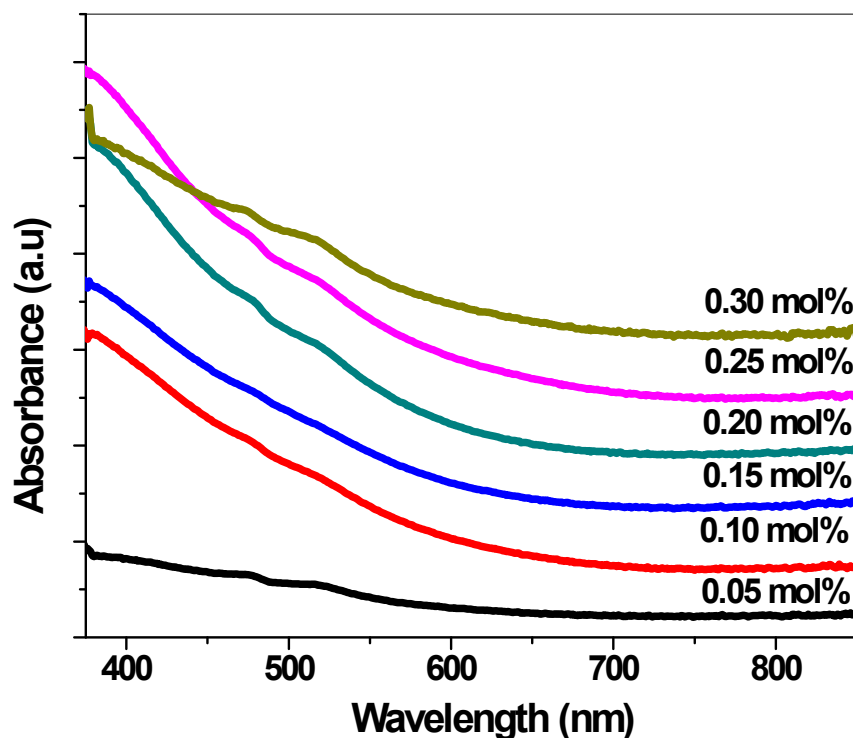

Figure S1. Visible absorbance spectra of cobalt doped pyrite  $\text{Co}_x\text{Fe}_{1-x}\text{S}_2$  thin films deposited from complexes (1) and (2) at 350 °C on glass substrate synthesized by AACVD with different starting ratio of cobalt complex (2).

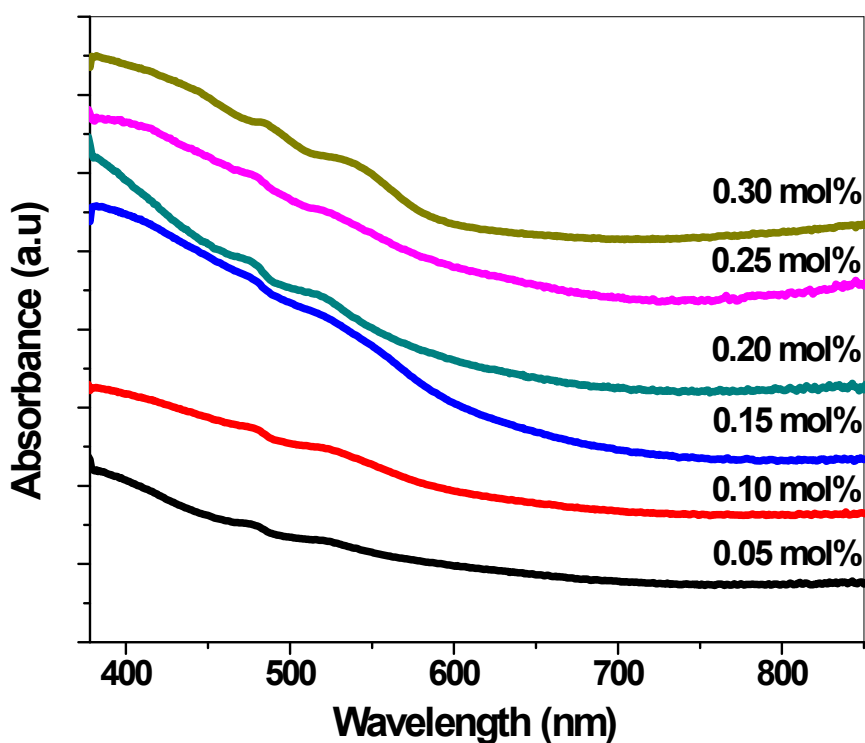

Figure S2. Visible absorbance spectra of nickel doped pyrite  $\text{Ni}_x\text{Fe}_{1-x}\text{S}_2$  thin films deposited from complexes (1) and (3) at 350 °C on glass substrate synthesized by AACVD with different starting ratio of nickel complex (3).

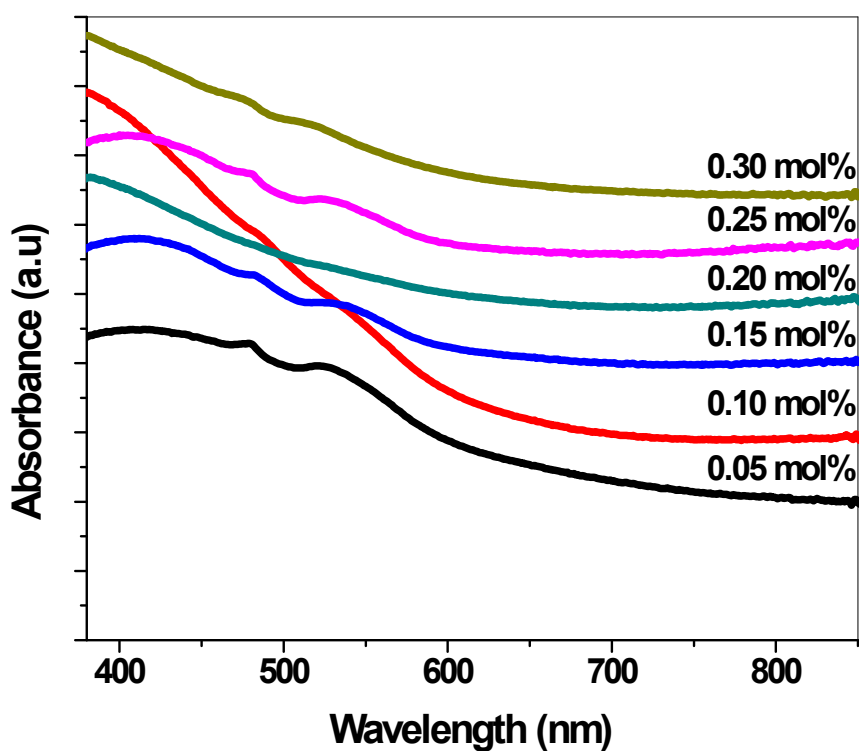

Figure S3. Visible absorbance spectra of copper-doped pyrite  $\text{Cu}_x\text{Fe}_{1-x}\text{S}_2$  thin films deposited from complexes (1) and (4) at 350 °C on glass substrate synthesized by AACVD with different starting ratio of copper complex (4)

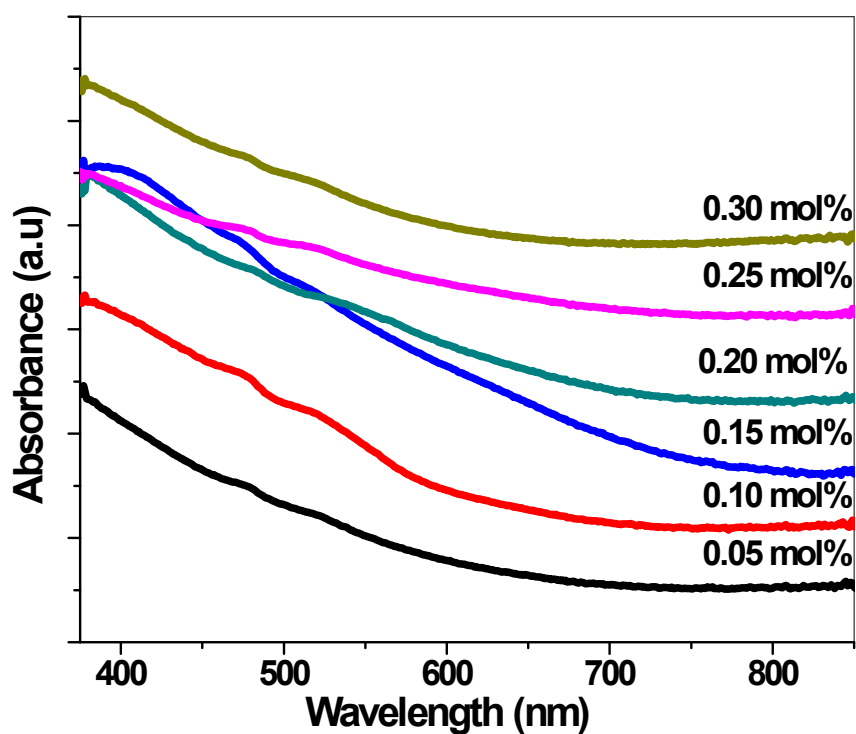

Figure S4. Absorbance spectra of zinc-doped pyrite  $\text{Zn}_x\text{Fe}_{1-x}\text{S}_2$  thin films deposited from complexes (1) and (5) at 350 °C on glass substrate synthesized by AACVD with different starting ratio of zinc complex (5)

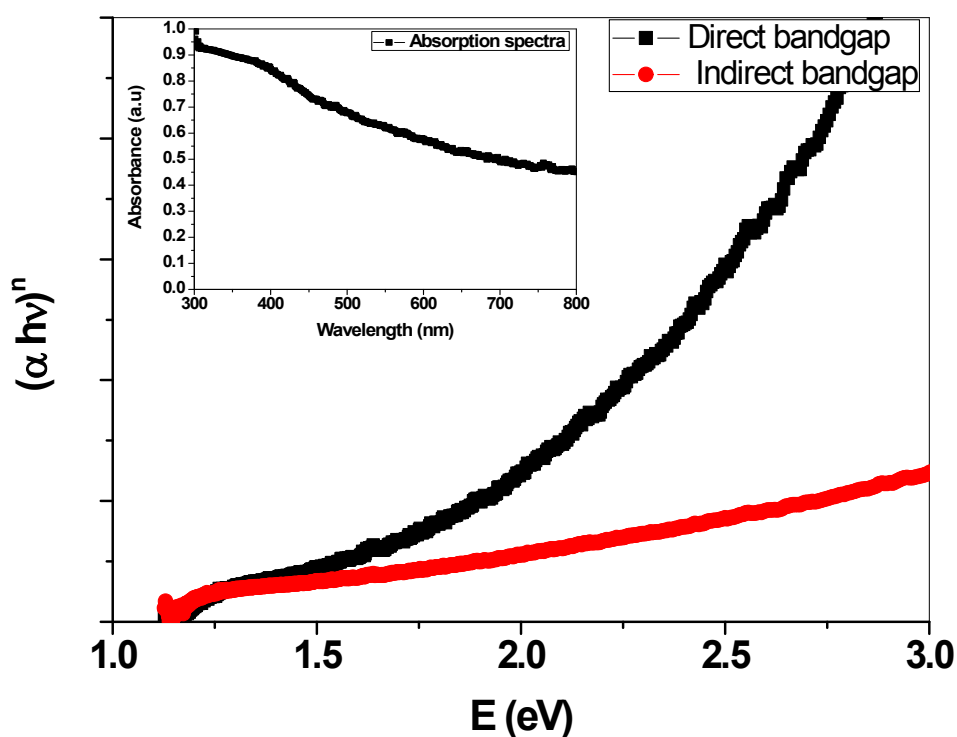

Figure S5 Direct ( $n = 2$ ) and indirect ( $n = 1/2$ ) band gap of iron sulphide thin films deposited from complexes (1) at 350 °C on glass substrate synthesised by AACVD.

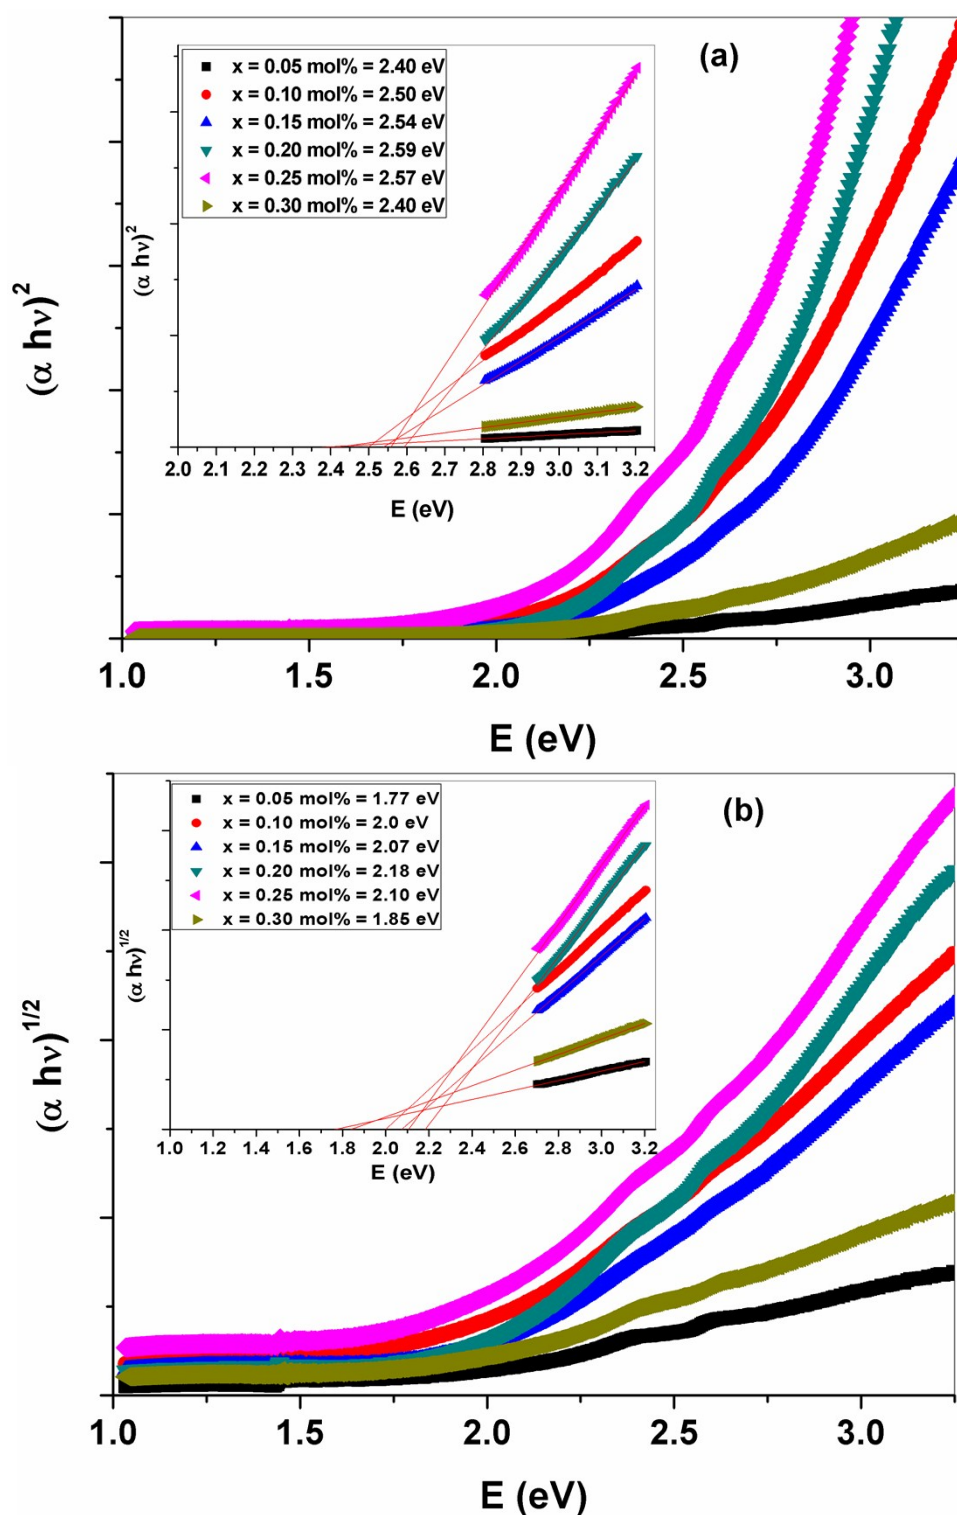

Figure S6. Direct (a) and indirect (b) band gap of cobalt doped iron sulphide  $\text{Co}_x\text{Fe}_{1-x}\text{S}_2$  thin films deposited from complexes (1) and (2) at 350 °C on glass substrate synthesised by AACVD with different starting ratio of cobalt complex (2).

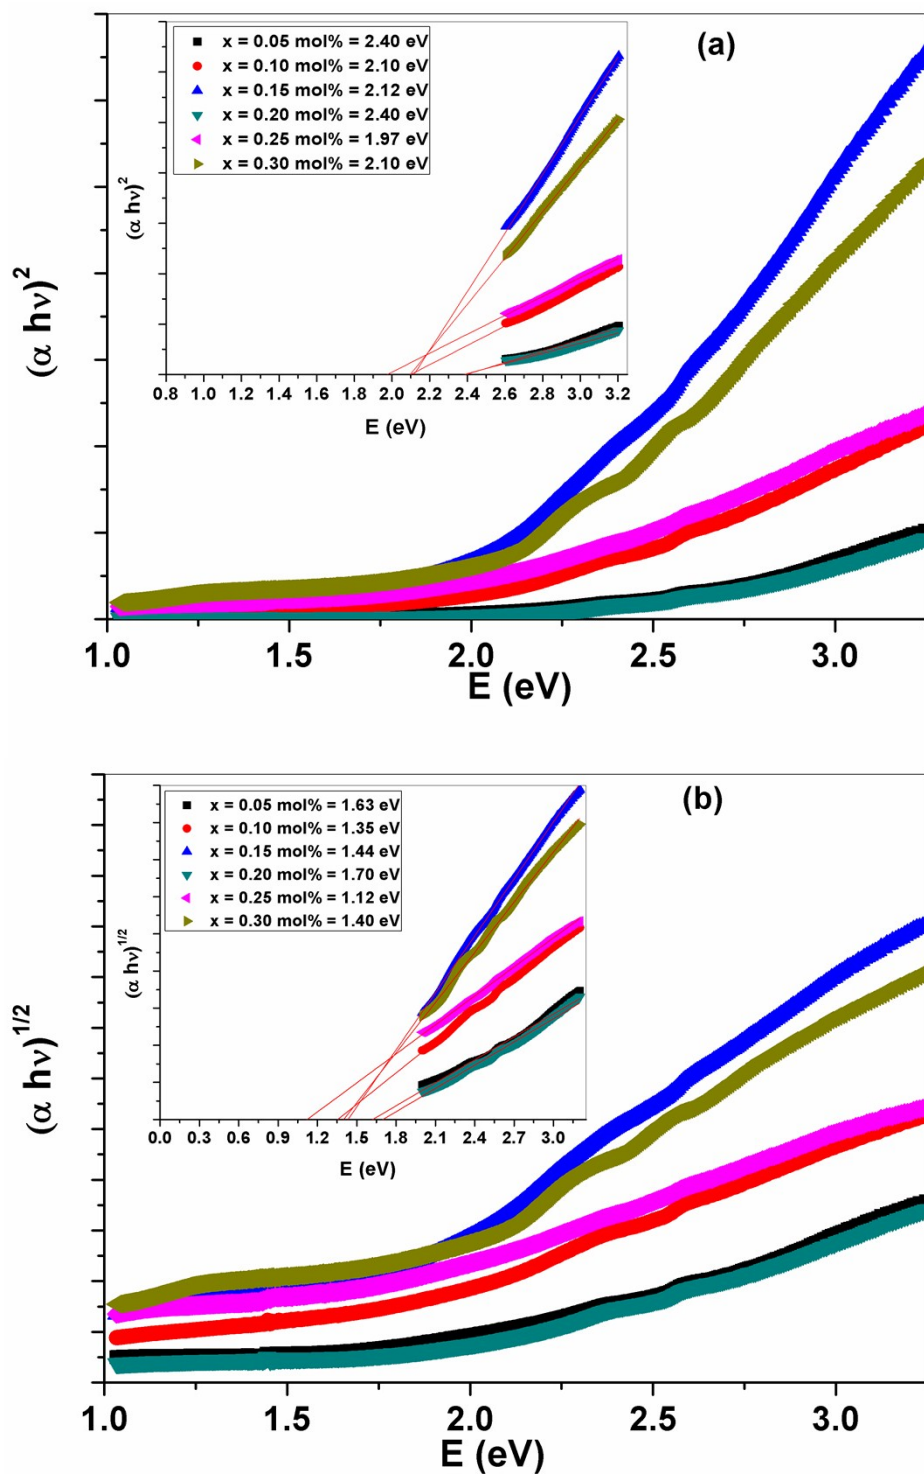

**Figure S7. Direct (a) and indirect (b) band gap of nickel doped iron sulphide  $\text{Ni}_x\text{Fe}_{1-x}\text{S}_2$  thin films deposited from complexes (1) and (3) at 350 °C on glass substrate synthesized by AACVD with different starting ratio of nickel complex (3).**

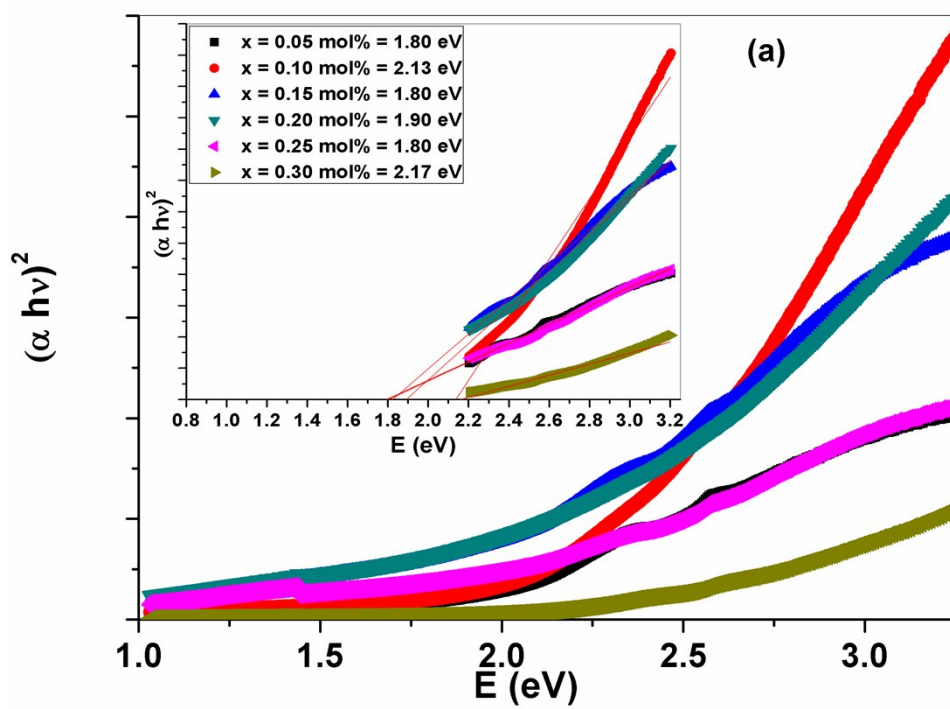

10

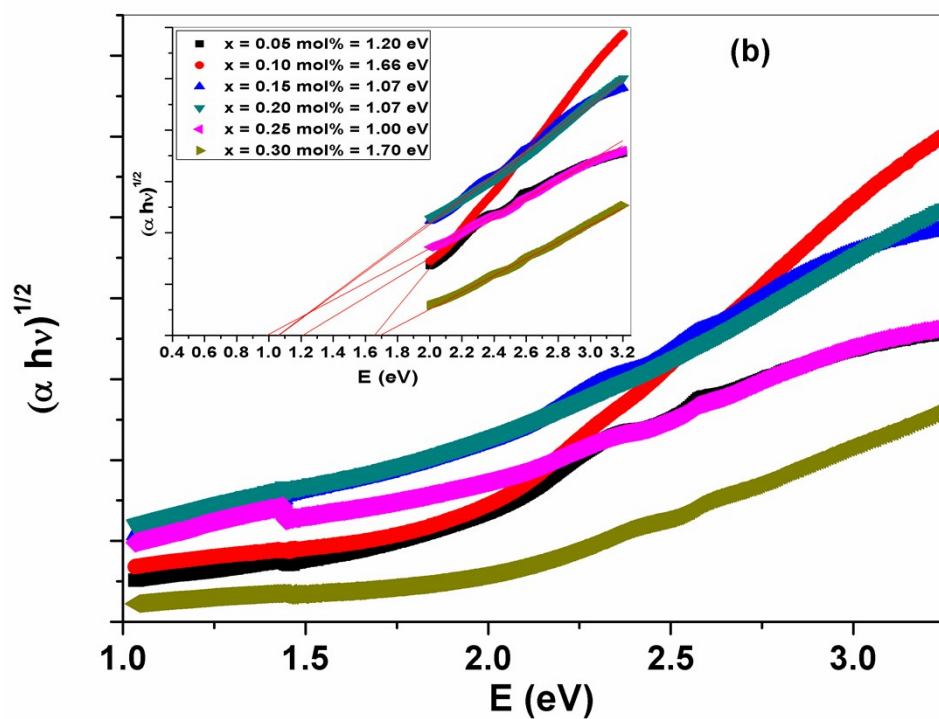

Figure S8. Direct (a) and indirect (b) band gap of copper doped iron sulphide  $\text{Cu}_x\text{Fe}_{1-x}\text{S}_2$  thin films deposited from complexes (1) and (4) at 350 °C on glass substrate synthesized by AACVD with different starting ratio of copper complex (4).

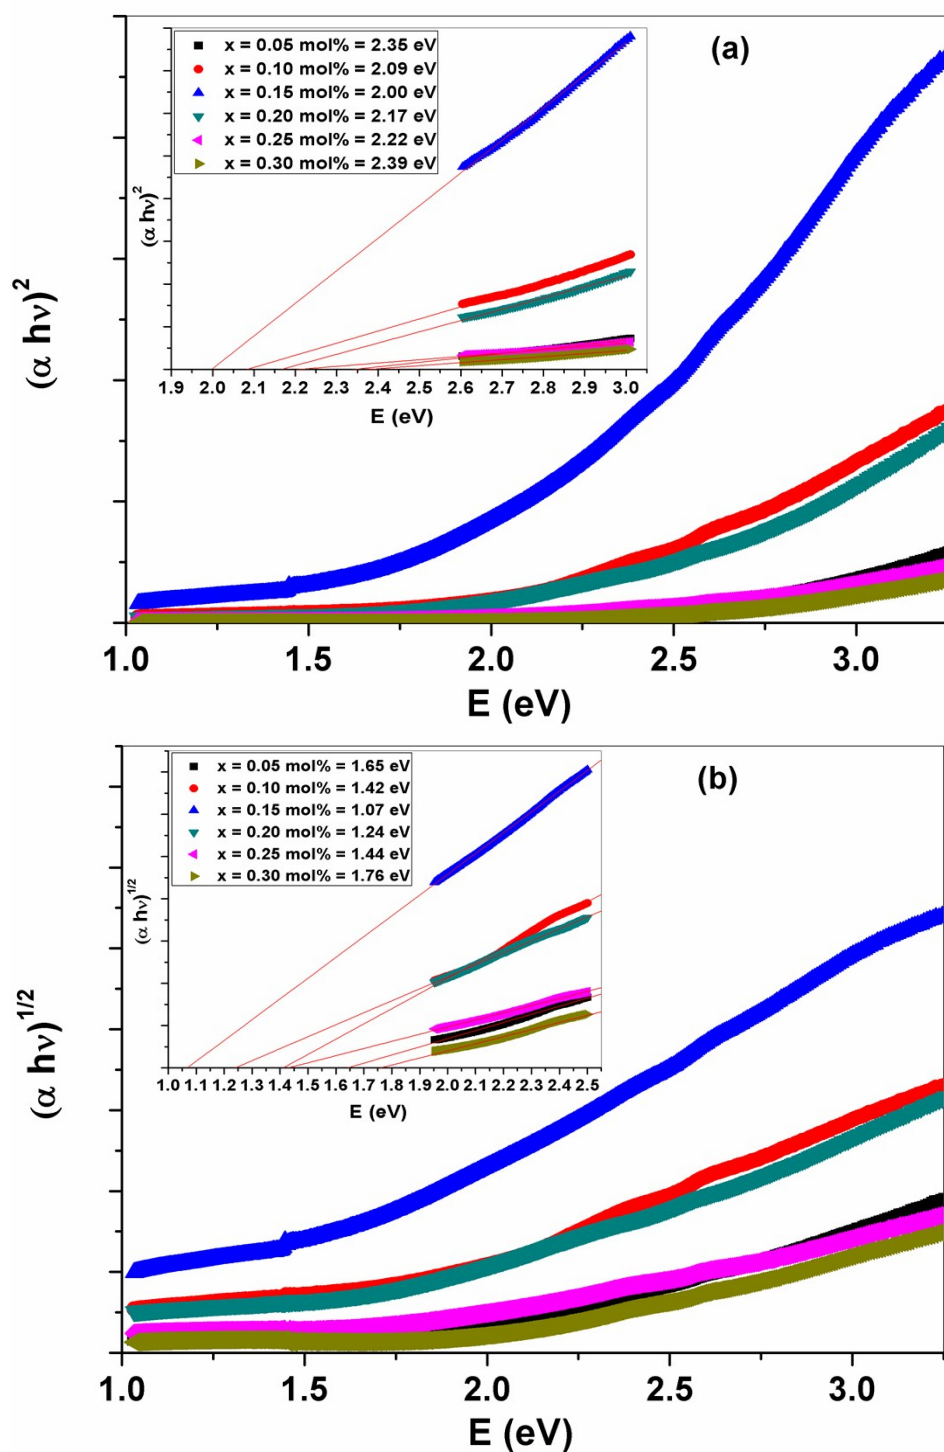

**Figure S9.** Direct (a) and indirect (b) band gap of zinc doped iron sulphide  $\text{Zn}_x\text{Fe}_{1-x}\text{S}_2$  thin films deposited from complexes (1) and (5) at 350 °C on glass substrate synthesized by AACVD with different starting ratio of zinc complex (5).



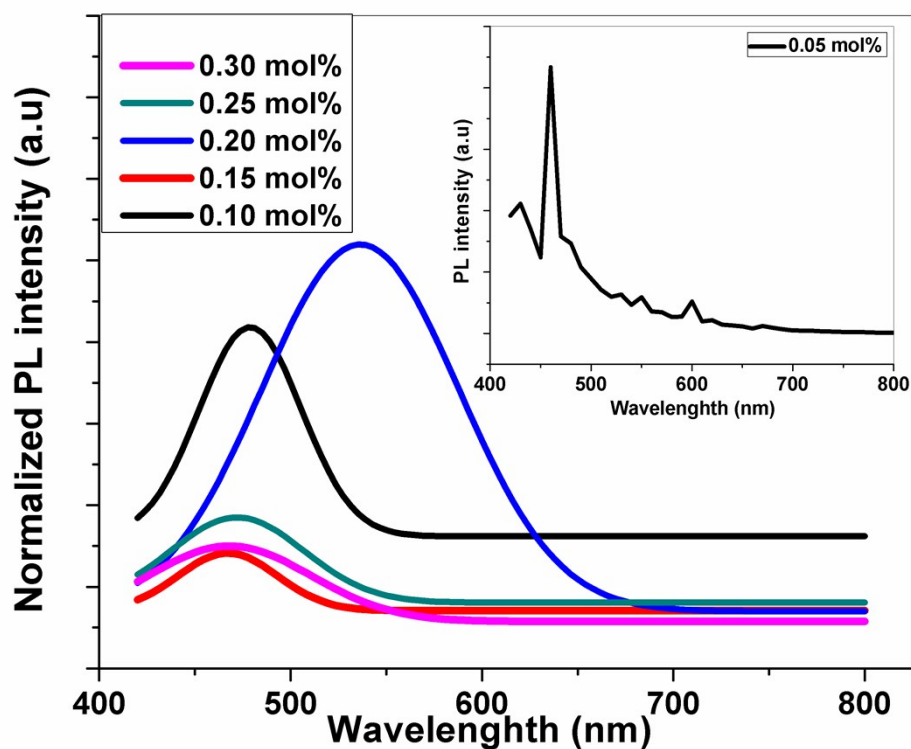

Figure S10. PL (Photoluminescence) spectra of cobalt doped iron sulphide  $\text{Co}_x\text{Fe}_{1-x}\text{S}_2$  thin films deposited from complexes (1) and (2) at 350 °C on glass substrate synthesised by AACVD with different starting ratio of cobalt complex (2).

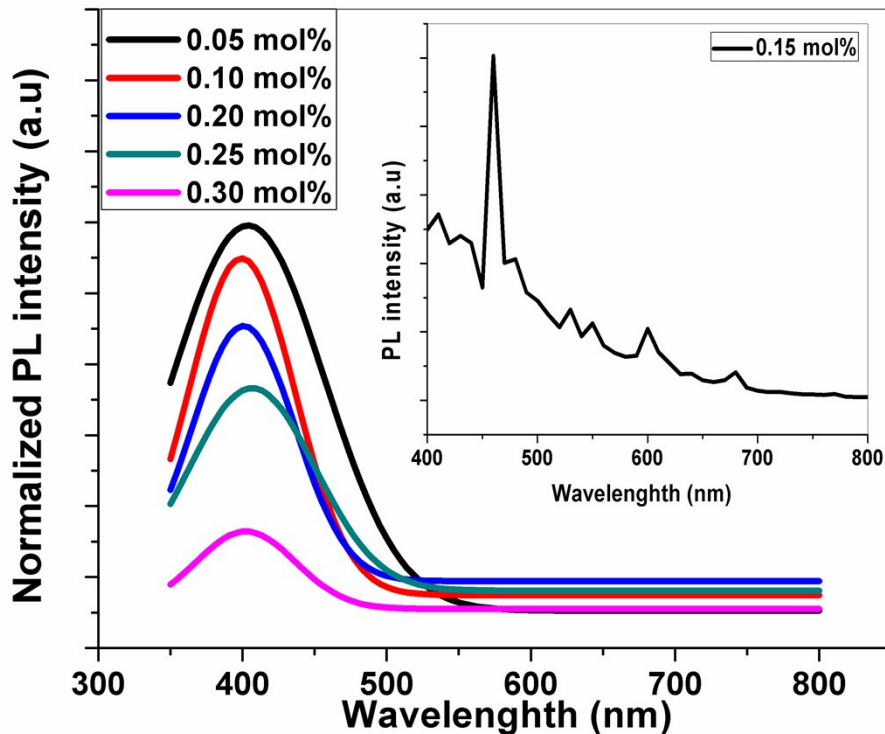

Figure S11. PL (Photoluminescence) spectra of nickel doped iron sulphide  $\text{Ni}_x\text{Fe}_{1-x}\text{S}_2$  thin films deposited from complexes (1) and (3) at 350 °C on glass substrate synthesized by AACVD with different starting ratio of nickel complex (3).



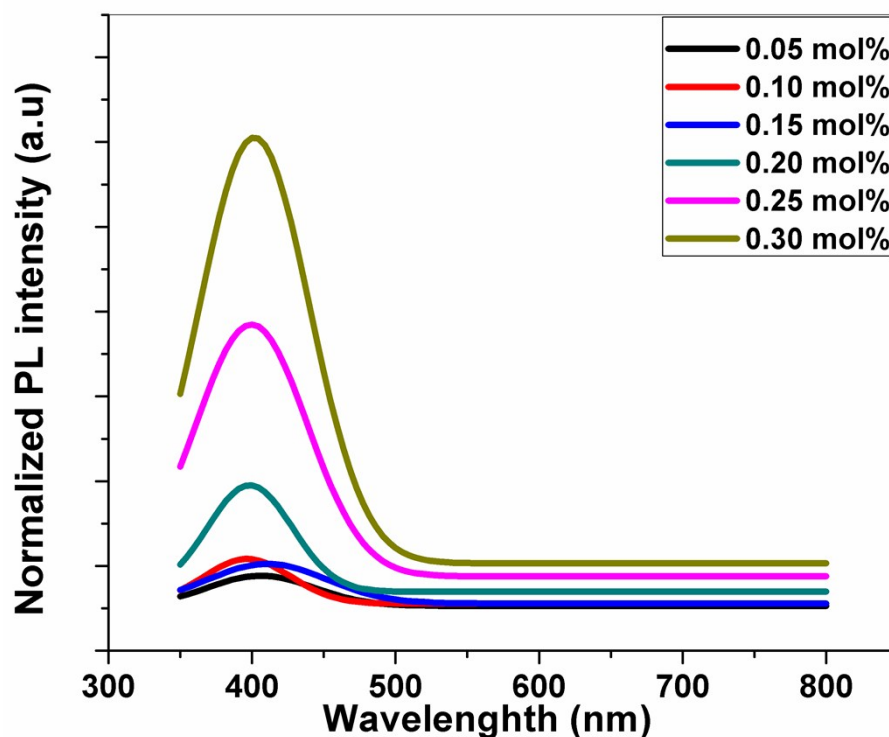

Figure S12. PL (Photoluminescence) spectra of copper doped iron sulphide  $\text{Cu}_x\text{Fe}_{1-x}\text{S}_2$  thin films deposited from complexes (1) and (4) at 350 °C on glass substrate synthesized by AACVD with different starting ratio of copper complex (4).

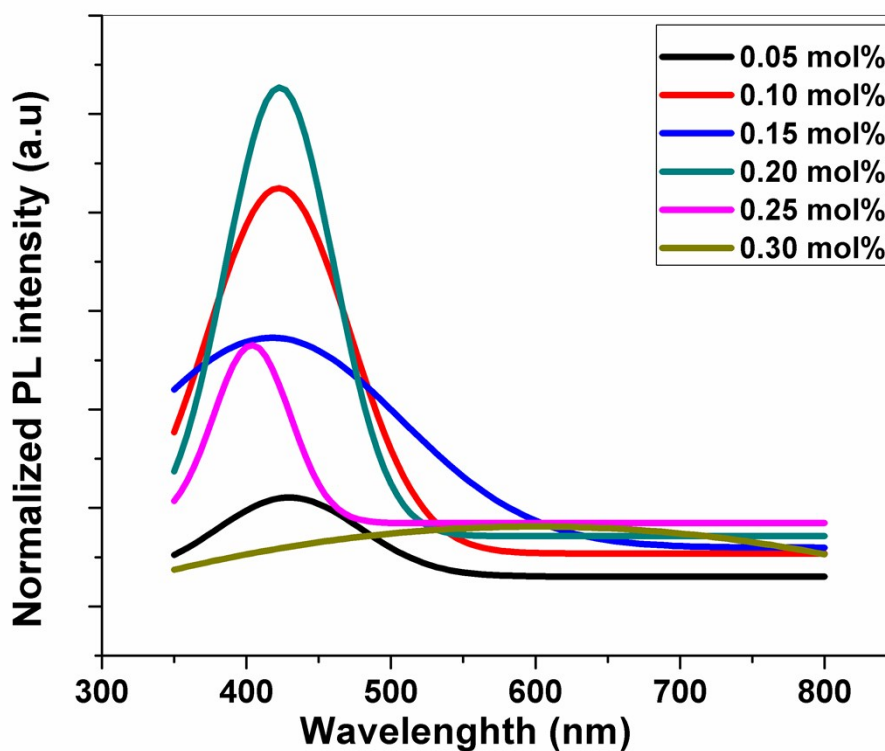

Figure S13. PL (Photoluminescence) spectra of zinc doped iron sulphide  $\text{Zn}_x\text{Fe}_{1-x}\text{S}_2$  thin films deposited from complexes (1) and (5) at 350 °C on glass substrate synthesized by AACVD with different starting ratio of zinc complex (5).
